# Supplementary material
Source: PubMed Central journal article supplement (PMC4833170)
Supplement: BCP-81-379-s001.pdf [file BCP-81-379-s001.pdf]

**e-Table 1: Inclusion and exclusion criteria of the TIOSPIR trial**

|                                           | Category                           | Explicit criterion                                                                                                                                              | Code /Unit  | Category | Explicit Threshold | Code/ Applicable in KVB | Code Unit used in KVB | Category/ Explicit used in KVB         | Code/ Threshold |
|-------------------------------------------|------------------------------------|-----------------------------------------------------------------------------------------------------------------------------------------------------------------|-------------|----------|--------------------|-------------------------|-----------------------|----------------------------------------|-----------------|
| Inclusion Criteria                        | Sex                                | Sex                                                                                                                                                             | Male/Female |          | Male/Female        | Yes                     | Male/Female           | Male/Female                            |                 |
|                                           | Age                                | Age                                                                                                                                                             | Years       |          | ≥40                | Yes                     | Years                 | 40                                     |                 |
|                                           | Lifestyle                          | Current or Ex-Smokers                                                                                                                                           | Pack-years  |          | ≥10                | No <sup>1</sup>         | -                     | -                                      |                 |
|                                           | Clinical diagnosis                 | COPD                                                                                                                                                            | Yes         |          | Yes                | Yes                     | ICD-10-GM             | J44.-                                  |                 |
|                                           | Post-bronchodilator spirometry     | FEV1/FVC ratio                                                                                                                                                  | NA          |          | 0.70               | No                      | -                     | -                                      |                 |
|                                           | Post-bronchodilator spirometry     | FEV1 % of predicted                                                                                                                                             | NA          |          | ≤70                | No <sup>2</sup>         | -                     | -                                      |                 |
|                                           | Study ability                      | Ability to use both the HandiHaler® and Respimat® devices                                                                                                       | Yes / no    |          | Yes                | No                      | -                     | -                                      |                 |
| Exclusion criteria                        | Co-morbidities                     | Significant diseases other than COPD that put the patient at risk for participation in the study or that might interfere with participation in the study        | Yes / No    |          | No                 | No                      | -                     | -                                      |                 |
|                                           | Concomitant cardiovascular disease | Myocardial infarction within the last 6 months                                                                                                                  | Yes / No    |          | No                 | Yes                     | ICD-10-GM             | I21, I22, I25.20                       |                 |
|                                           |                                    | Hospitalization for cardiac failure (NYHA Class III or IV) during the last year                                                                                 | Yes / No    |          | No                 | Yes <sup>3</sup>        | ICD-10-GM             | I50.14                                 |                 |
|                                           |                                    | Unstable or life-threatening cardiac arrhythmia requiring intervention or change in drug therapy during the last year                                           | Yes/No      |          | No                 | Yes <sup>4</sup>        | ICD-10-GM             | I44.2, I45.9, I46, I47.0, I47.2, I49.0 |                 |
|                                           | Other significant lung diseases    | Known active tuberculosis                                                                                                                                       | Yes/No      |          | No                 | Yes                     | ICD-10-GM             | A15, A16, A17, A18, A19                |                 |
|                                           |                                    | Asthma                                                                                                                                                          | Yes/No      |          | No                 | Yes                     | ICD-10-GM             | J45, J46                               |                 |
|                                           |                                    | Cystic fibrosis                                                                                                                                                 | Yes/No      |          | No                 | Yes                     | ICD-10-GM             | E84                                    |                 |
|                                           |                                    | Clinically evident bronchiectasis (not excluded for radiographic evidence of bronchiectasis if they were not being treated for this condition)                  | Yes/No      |          | No                 | Yes                     | ICD-10-GM             | J47                                    |                 |
|                                           |                                    | Interstitial lung disease                                                                                                                                       | Yes/No      |          | No                 | Yes                     | ICD-10-GM             | J60-J70, J80, J82, J84                 |                 |
|                                           |                                    | Resectional lung surgery                                                                                                                                        | Yes/No      |          | No                 | No                      | -                     | -                                      |                 |
|                                           |                                    | Pulmonary thromboembolic disease                                                                                                                                | Yes/No      |          | No                 | Yes                     | ICD-10-GM             | I26                                    |                 |
|                                           | Cancer                             | Malignancies (other than treated basal cell carcinoma) requiring therapy within the last 5 years (resection, radiation, chemotherapy, or biological treatments) | Yes/No      |          | No                 | Yes <sup>5</sup>        | ICD-10-GM             | C00-C97 except C44                     |                 |
|                                           | Others                             | Known moderate to severe renal impairment (as judged by the investigator)                                                                                       | Yes/No      |          | No                 | Yes                     | ICD-10-GM             | N18.0, N18.83, N18.84                  |                 |
|                                           |                                    | Drug abuse within the past 12 months                                                                                                                            | Yes/No      |          | No                 | Yes                     | ICD-10-GM             | F11.2, F12.2, F13.2, F19.0             |                 |
|                                           |                                    | Significant alcohol abuse within the past 12 months                                                                                                             | Yes/No      |          | No                 | Yes                     | ICD-10-GM             | F10, K70, Z72.0                        |                 |
| Known hypersensitivity to anticholinergic |                                    | Yes/No                                                                                                                                                          |             | No       | (Yes)              | ICD-10-GM               | E73.-                 |                                        |                 |

| Category      | Explicit criterion                                                                                                                                                                                                             | Code /Unit | Category | Explicit Threshold | Code/ Applicable in KVB | Code Unit used in KVB | Category/ Explicit used in KVB            | Code/ Threshold |
|---------------|--------------------------------------------------------------------------------------------------------------------------------------------------------------------------------------------------------------------------------|------------|----------|--------------------|-------------------------|-----------------------|-------------------------------------------|-----------------|
|               | drugs, lactose, or other components of the HandiHaler® or Respimat® inhalation solution delivery system                                                                                                                        |            |          |                    |                         |                       |                                           |                 |
|               | Known narrow angle glaucoma                                                                                                                                                                                                    | Yes/No     | No       |                    | Yes                     | ICD-10-GM             | H40.2                                     |                 |
|               | Known significant symptomatic prostatic hyperplasia or bladder-neck obstruction. Subjects whose symptoms were controlled on treatment may have been included.                                                                  | Yes/No     | No       |                    | Yes                     | ICD-10-GM             | N32.0                                     |                 |
|               | Pregnancy                                                                                                                                                                                                                      | Yes/No     | No       |                    | No                      | -                     | -                                         |                 |
|               | Lactation                                                                                                                                                                                                                      | Yes/No     | No       |                    | No                      | -                     | -                                         |                 |
|               | Child-bearing potential not on contraceptives                                                                                                                                                                                  | Yes/No     | No       |                    | Yes                     | ATC                   | No G03A                                   |                 |
|               |                                                                                                                                                                                                                                |            |          |                    |                         | Age                   | ≤ 45 years                                |                 |
| Unstable COPD |                                                                                                                                                                                                                                |            |          |                    |                         |                       |                                           |                 |
|               | Plans for lung transplantation or lung volume reduction surgery                                                                                                                                                                | Yes/No     | No       |                    | No                      | -                     | Z94.2, Z94.3, T86.3, T86.81, U55.2, U55.3 |                 |
|               | Use of supplemental oxygen for more than 12 hours per day                                                                                                                                                                      | Yes/No     | No       |                    | No                      | -                     | -                                         |                 |
|               | Completion of a pulmonary rehabilitation program in the 6 weeks prior to the screening visit or subjects who were currently in a pulmonary rehabilitation program that was not maintained throughout the duration of the study | Yes/No     | No       |                    | No                      | -                     | -                                         |                 |
|               | Unstable dose of systemic corticosteroid medication (i.e. less than 6 weeks on stable dose) or at doses in excess of the equivalent of 10 mg prednisolone per day                                                              | Yes/No     | No       |                    | No <sup>6</sup>         | -                     | -                                         |                 |
| Others        |                                                                                                                                                                                                                                |            |          |                    |                         |                       |                                           |                 |
|               | Current participation in an interventional study                                                                                                                                                                               | Yes/No     | No       |                    | No                      | -                     | -                                         |                 |
|               | Intake of an investigational drug within 30 days prior to the Screening visit                                                                                                                                                  | Yes/No     | No       |                    | No                      | -                     | -                                         |                 |
|               | Previous participation in this study (receipt of randomised treatment)                                                                                                                                                         | Yes/No     | No       |                    | No                      | -                     | -                                         |                 |

Legend: NA, not applicable; FEV1, forced expiratory volume in one second; FVC, forced vital capacity; ICD-10-GM, International Statistical Classification of Diseases and Related Health Problems – Version 10 (German modification); KVB, Association of Statutory Health Insurance Physicians, Bavaria, Germany. <sup>1</sup> In a pilot analysis, only a small number of patients (<0.01%) was documented with smoking-related ICD codes (T65.2, F17.2). <sup>2</sup> In a pilot study, only a small number of patients (<0.01%) was documented with FEV-1-related ICD codes (J44.- (5th digit: 0, 1 or 2). Most patients were coded with J44.9 (Chronic obstructive pulmonary disease, unspecified). <sup>3</sup> As a surrogate for heart failure-related hospital admissions (New York Heart Association (NYHA) Class III or IV), ICD code I50.14 (Left ventricular failure, NYHA stage IV) was used. <sup>4</sup> Since for several drugs, not only arrhythmias but other indications might be present (e.g., beta-blockers might be prescribed for atrial fibrillation or hypertension), a unique linkage between drugs and arrhythmias or other indications was not possible. Hence, several ICD codes were used for defining life-threatening arrhythmia. <sup>5</sup> As surrogate for malignancies requiring therapy, ICD codes C00–C97 (Malignant neoplasms) are used (except basal cell carcinoma, C44). <sup>6</sup> Since the prescribed daily dose was unavailable, no dose-related analyses could be conducted.

**e-Table 2: Period prevalence per 10,000 persons for stratified by age group and inhaler device**

|       | HandiHaler® period prevalence rate per 10,000 persons |       |       |       |       |                           | Respimat® period prevalence rate per 10,000 persons |      |                            |
|-------|-------------------------------------------------------|-------|-------|-------|-------|---------------------------|-----------------------------------------------------|------|----------------------------|
|       | 2004                                                  | 2005  | 2006  | 2007  | 2008  | Change [%]<br>(2004–2008) | 2007                                                | 2008 | Change [%] (2007–<br>2008) |
| 20–29 | 2.3                                                   | 2.1   | 2.0   | 1.9   | 1.6   | -29.9                     | 0.1                                                 | 0.4  | 325.5                      |
| 30–39 | 4.5                                                   | 5.1   | 4.9   | 5.1   | 4.1   | -7.4                      | 0.1                                                 | 0.9  | 737.8                      |
| 40–49 | 14.1                                                  | 16.7  | 15.8  | 16.9  | 15.6  | 10.6                      | 0.5                                                 | 2.5  | 454.7                      |
| 50–59 | 50.1                                                  | 62.3  | 62.8  | 64.8  | 61.5  | 22.8                      | 1.5                                                 | 9.0  | 521.2                      |
| 60–69 | 97.9                                                  | 123.9 | 134.7 | 147.6 | 147.3 | 50.5                      | 3.2                                                 | 19.4 | 501.9                      |
| 70–79 | 155.1                                                 | 207.4 | 209.6 | 225.1 | 219.7 | 41.7                      | 3.8                                                 | 24.8 | 555.7                      |
| 80–89 | 122.3                                                 | 181.0 | 198.7 | 230.3 | 241.7 | 97.7                      | 4.4                                                 | 25.9 | 490.8                      |
| 90+   | 49.5                                                  | 78.3  | 91.1  | 115.5 | 125.7 | 154.1                     | 1.5                                                 | 19.3 | 1,217.2                    |

**e-Table 3: Number and proportion of off-label indications (year 2008, multiple counting of off-label indications per prescription)**

|                                               | <b>HandiHaler® (n, %)</b> | <b>Respimat® (n, %)</b> |
|-----------------------------------------------|---------------------------|-------------------------|
| Asthma                                        | 2,674 (37.4%)             | 438 (40.3%)             |
| Acute bronchitis                              | 1,030 (14.4%)             | 208 (19.2%)             |
| Acute upper respiratory infections            | 1,297 (18.1%)             | 271 (25.0%)             |
| Chronic bronchitis                            | 195 (18.0%)               | 141 (13.0%)             |
| Emphysema                                     | 421 (5.9%)                | 80 (7.4%)               |
| Influenza and pneumonia                       | 628 (8.8%)                | 120 (11.0%)             |
| Other diseases of the respiratory system      | 1,080 (15.1%)             | 188 (17.3%)             |
| Other diseases of upper respiratory tract     | 1,387 (19.4%)             | 243 (22.4%)             |
| Unspecified acute lower respiratory infection | 1,022 (14.3%)             | 868 (12.1%)             |
| Missing or other diagnoses                    | 1,766 (24.7%)             | 207 (19.1%)             |

**e-Table 4: Characteristics of patients potentially excluded / not included in the TIOSPIR trial**

|                          | <b>HandiHaler®</b> |                 |                | <b>Respimat®</b> |                 |                |
|--------------------------|--------------------|-----------------|----------------|------------------|-----------------|----------------|
|                          | <b>Excluded</b>    | <b>Included</b> | <b>p-value</b> | <b>Excluded</b>  | <b>Included</b> | <b>p-value</b> |
| Age [years]<br>(mean±SD) | 69.0±12.1          | 70.5±10.1       | <0.0001        | 67.3±13.0        | 69.3±10.4       | <0.0001        |
| Female (n (%))           | 18,886 (44.8%)     | 8,755 (44.0%)   | 0.069          | 2,556 (47.0%)    | 1,093 (46.8%)   | 0.929          |
